# Supplementary material
Source: publisher figshare collection journal article supplement (https://brill.figshare.com/articles/dataset/_/27087922)
Supplement: Supplementary file 1 [file 1]

# **Perceived Meaningfulness of Semantically Noncongruent Stimuli Increases in Art Context**

**Marina Iosifyan\* and Judith Wolfe**

School of Divinity, University of St Andrews, St Mary's College, St Andrews, KY16  
9UB, UK

\*Corresponding author; e-mail: [marina.iosifyan@gmail.com](mailto:marina.iosifyan@gmail.com)

## **Supplementary material**

The Excel-sheets contain the supporting data of the findings of Study 1, Study 2 and Study 3.

**Table S1.** List of sentences in Study 1.

| <b>Sentence</b>                                      | <b>Congruency</b> |
|------------------------------------------------------|-------------------|
| His view was blocked by the music.                   | Noncongruent      |
| On their visit to England, they took a formal sound. | Noncongruent      |
| None of his books made any peace.                    | Noncongruent      |
| There's something grand about the onion.             | Noncongruent      |
| The paint turned out to be the wrong week.           | Noncongruent      |
| The governor vetoed the new grocery.                 | Noncongruent      |
| When the two met, one of them held out his lemons.   | Noncongruent      |
| The kids fed the ducks some stale friends.           | Noncongruent      |
| In the first space enter your love.                  | Noncongruent      |
| His ability to work was square.                      | Noncongruent      |
| The whole town came to hear their mayor learn.       | Noncongruent      |
| Most cats see well at court.                         | Noncongruent      |
| They left the dirty dishes in the ocean.             | Noncongruent      |
| The sun went down before we could pretend.           | Noncongruent      |
| I could not remember his flavour.                    | Noncongruent      |
| They raised pigs on their firm.                      | Noncongruent      |
| My sister bought tickets for the opening lie.        | Noncongruent      |
| At night the old woman locked the city.              | Noncongruent      |
| It's hard to admit when one is young.                | Noncongruent      |
| Some people have never had a square idea.            | Noncongruent      |
| The fertilizer enriched the evening.                 | Noncongruent      |
| Tim threw a rock and broke the argument.             | Noncongruent      |
| His leaving home amazed all his spiders.             | Noncongruent      |
| Captain Sheir wanted to stay with the sinking tone.  | Noncongruent      |
| When you go to bed turn off the flesh.               | Noncongruent      |
| His job was to keep the sidewalk happy.              | Noncongruent      |
| The bill was due at the end of the nation.           | Noncongruent      |
| John poured himself a glass of gin.                  | Congruent         |
| Even infants can be taught to listen.                | Congruent         |
| My uncle gave my mother a big rose.                  | Congruent         |
| The police had never found a man so nervous.         | Congruent         |

---

|                                                |           |
|------------------------------------------------|-----------|
| The kind old man asked us to come.             | Congruent |
| The choir sang hymns while the people hummed.  | Congruent |
| There are times when life seems hopeless.      | Congruent |
| The surface of the water was nice and warm.    | Congruent |
| His ring fell into a hole in the sewer.        | Congruent |
| The judge warned about the dangers of lying.   | Congruent |
| Ken built his new house on a quiet street.     | Congruent |
| In the distance they heard the thunder.        | Congruent |
| Rita slowly walked down the shaky ladder.      | Congruent |
| You can't buy anything for a dime.             | Congruent |
| Sometimes success is simply a matter of luck.  | Congruent |
| He put his feet up on the table.               | Congruent |
| Jim wanted to change the way he looked.        | Congruent |
| What you find depends on where you look.       | Congruent |
| Autumn is a good time to buy some new clothes. | Congruent |
| David's shirt was made of cotton.              | Congruent |
| It's easy to get lost without a map.           | Congruent |
| The old milk tasted very sour.                 | Congruent |
| The cows moved from the sun into the shade.    | Congruent |
| We sometimes forget that golf is just a game.  | Congruent |
| Water and sunshine help plants grow.           | Congruent |
| He wondered if the storm had done much damage. | Congruent |
| Bill jumped in the lake and made a big splash. | Congruent |

---

**Table S2.** List of sentences in Study 2.

| Sentence                                                 |
|----------------------------------------------------------|
| All the guests had a very good pin.                      |
| Joan fed her baby some warm ambition.                    |
| The old house will be torn awake.                        |
| He liked lemon and sugar in his sea.                     |
| The elderly sometimes lose their gravity.                |
| The wealthy child attended a private afternoon.          |
| If the crowd quiets down the band will flow.             |
| The dispute was settled by a third nature.               |
| The gas station is about two miles down the serendipity. |
| The lawyer feared that his client was verbal.            |
| Without food a man would die in several daydreams.       |
| He shouted at the top of his skyscraper.                 |
| John felt sorry, but it was not his fame.                |
| The lecture should last about one cigarette.             |
| He drove the nail into the liquid.                       |
| The boat passed easily under the spoon.                  |
| He loosened the tie around his check.                    |
| John swept the floor with a groom.                       |
| The game was called when it started to kill.             |
| Jean hurriedly shoved her way through the pocket.        |
| Vic asked her to repeat what she had mislead.            |
| I don't know why he didn't take his anger.               |
| She went to the salon to colour her stare.               |
| He scraped the cold food from his debate.                |
| He lay down and went to church.                          |
| The academic year began in the maul.                     |

**Table S3.** List of images used in Study 3.

| Scene                      | Animal_Object | Congruency   |
|----------------------------|---------------|--------------|
| anim_artif_Paire15_rvb.jpg | Animal        | Noncongruent |
| anim_artif_Paire16_rvb.jpg | Animal        | Noncongruent |
| anim_artif_Paire17_rvb.jpg | Animal        | Noncongruent |
| anim_artif_Paire18_rvb.jpg | Animal        | Noncongruent |
| anim_artif_Paire21_rvb.jpg | Animal        | Noncongruent |
| anim_artif_Paire32_rvb.jpg | Animal        | Noncongruent |
| anim_artif_Paire44_rvb.jpg | Animal        | Noncongruent |
| anim_artif_Paire49_rvb.jpg | Animal        | Noncongruent |
| anim_artif_Paire50_rvb.jpg | Animal        | Noncongruent |
| anim_artif_Paire54_rvb.jpg | Animal        | Noncongruent |
| anim_nat_Paire55_rvb.jpg   | Animal        | Congruent    |
| anim_nat_Paire60_rvb.jpg   | Animal        | Congruent    |
| anim_nat_Paire66_rvb.jpg   | Animal        | Congruent    |
| anim_nat_Paire68_rvb.jpg   | Animal        | Congruent    |
| anim_nat_Paire73_rvb.jpg   | Animal        | Congruent    |
| anim_nat_Paire76_rvb.jpg   | Animal        | Congruent    |
| anim_nat_Paire78_rvb.jpg   | Animal        | Congruent    |
| anim_nat_Paire88_rvb.jpg   | Animal        | Congruent    |
| anim_nat_Paire93_rvb.jpg   | Animal        | Congruent    |
| anim_nat_Paire98_rvb.jpg   | Animal        | Congruent    |
| obj_artif_Paire20_rvb.jpg  | Object        | Congruent    |
| obj_artif_Paire23_rvb.jpg  | Object        | Congruent    |
| obj_artif_Paire2_rvb.jpg   | Object        | Congruent    |
| obj_artif_Paire31_rvb.jpg  | Object        | Congruent    |
| obj_artif_Paire36_rvb.jpg  | Object        | Congruent    |
| obj_artif_Paire41_rvb.jpg  | Object        | Congruent    |
| obj_artif_Paire42_rvb.jpg  | Object        | Congruent    |
| obj_artif_Paire44_rvb.jpg  | Object        | Congruent    |
| obj_artif_Paire4_rvb.jpg   | Object        | Congruent    |
| obj_artif_Paire5_rvb.jpg   | Object        | Congruent    |
| obj_nat_Paire70_rvb.jpg    | Object        | Noncongruent |
| obj_nat_Paire72_rvb.jpg    | Object        | Noncongruent |
| obj_nat_Paire74_rvb.jpg    | Object        | Noncongruent |
| obj_nat_Paire76_rvb.jpg    | Object        | Noncongruent |
| obj_nat_Paire87_rvb.jpg    | Object        | Noncongruent |
| obj_nat_Paire8_rvb.jpg     | Object        | Noncongruent |
| obj_nat_Paire91_rvb.jpg    | Object        | Noncongruent |
| obj_nat_Paire95_rvb.jpg    | Object        | Noncongruent |
| obj_nat_Paire97_rvb.jpg    | Object        | Noncongruent |
| obj_nat_Paire98_rvb.jpg    | Object        | Noncongruent |
| anim_artif_Paire55_rvb.jpg | Animal        | Noncongruent |
| anim_artif_Paire60_rvb.jpg | Animal        | Noncongruent |
| anim_artif_Paire66_rvb.jpg | Animal        | Noncongruent |
| anim_artif_Paire68_rvb.jpg | Animal        | Noncongruent |
| anim_artif_Paire73_rvb.jpg | Animal        | Noncongruent |

|                            |        |              |
|----------------------------|--------|--------------|
| anim_artif_Paire76_rvb.jpg | Animal | Noncongruent |
| anim_artif_Paire78_rvb.jpg | Animal | Noncongruent |
| anim_artif_Paire88_rvb.jpg | Animal | Noncongruent |
| anim_artif_Paire93_rvb.jpg | Animal | Noncongruent |
| anim_artif_Paire98_rvb.jpg | Animal | Noncongruent |
| anim_nat_Paire15_rvb.jpg   | Animal | Congruent    |
| anim_nat_Paire16_rvb.jpg   | Animal | Congruent    |
| anim_nat_Paire17_rvb.jpg   | Animal | Congruent    |
| anim_nat_Paire18_rvb.jpg   | Animal | Congruent    |
| anim_nat_Paire21_rvb.jpg   | Animal | Congruent    |
| anim_nat_Paire32_rvb.jpg   | Animal | Congruent    |
| anim_nat_Paire44_rvb.jpg   | Animal | Congruent    |
| anim_nat_Paire49_rvb.jpg   | Animal | Congruent    |
| anim_nat_Paire50_rvb.jpg   | Animal | Congruent    |
| anim_nat_Paire54_rvb.jpg   | Animal | Congruent    |
| obj_artif_Paire70_rvb.jpg  | Object | Congruent    |
| obj_artif_Paire72_rvb.jpg  | Object | Congruent    |
| obj_artif_Paire74_rvb.jpg  | Object | Congruent    |
| obj_artif_Paire76_rvb.jpg  | Object | Congruent    |
| obj_artif_Paire87_rvb.jpg  | Object | Congruent    |
| obj_artif_Paire8_rvb.jpg   | Object | Congruent    |
| obj_artif_Paire91_rvb.jpg  | Object | Congruent    |
| obj_artif_Paire95_rvb.jpg  | Object | Congruent    |
| obj_artif_Paire97_rvb.jpg  | Object | Congruent    |
| obj_artif_Paire98_rvb.jpg  | Object | Congruent    |
| obj_nat_Paire20_rvb.jpg    | Object | Noncongruent |
| obj_nat_Paire23_rvb.jpg    | Object | Noncongruent |
| obj_nat_Paire2_rvb.jpg     | Object | Noncongruent |
| obj_nat_Paire31_rvb.jpg    | Object | Noncongruent |
| obj_nat_Paire36_rvb.jpg    | Object | Noncongruent |
| obj_nat_Paire41_rvb.jpg    | Object | Noncongruent |
| obj_nat_Paire42_rvb.jpg    | Object | Noncongruent |
| obj_nat_Paire44_rvb.jpg    | Object | Noncongruent |
| obj_nat_Paire4_rvb.jpg     | Object | Noncongruent |
| obj_nat_Paire5_rvb.jpg     | Object | Noncongruent |

---
